# Supplementary material
Source: publisher figshare collection journal article supplement (https://tandf.figshare.com/articles/dataset/_/4793818)
Supplement: Supplementary file 1 [file 1]

red gene id intronless Jian *et al.*, 2008

black gene i introns Jian et al., 2008

subcellular localization SUBA3; <http://suba3.plantenergy.uwa.edu.au/>

| AGI       | Description                                             | SUBAcon    | PFAM Dom: PF01535 |
|-----------|---------------------------------------------------------|------------|-------------------|
| AT1G55890 | Tetratricopeptide repeat (TPR)-like superfamily protein | nucleus    | 1                 |
| AT2G37230 | Tetratricopeptide repeat (TPR)-like superfamily protein | nucleus    | 3                 |
| AT3G02650 | Tetratricopeptide repeat (TPR)-like superfamily protein | nucleus    | 4                 |
| AT1G02370 | Tetratricopeptide repeat (TPR)-like superfamily protein | mitochondr | 5                 |
| AT2G21090 | Pentatricopeptide repeat (PPR-like) superfamily protein | mitochondr | 2                 |
| AT1G16830 | Pentatricopeptide repeat (PPR) superfamily protein      | mitochondr | 2                 |
| AT1G25360 | Pentatricopeptide repeat (PPR) superfamily protein      | mitochondr | 7                 |
| AT1G71210 | Pentatricopeptide repeat (PPR) superfamily protein      | mitochondr | 4                 |
| AT3G22670 | Pentatricopeptide repeat (PPR) superfamily protein      | mitochondr | 2                 |
| AT3G61520 | Pentatricopeptide repeat (PPR) superfamily protein      | mitochondr | 1                 |
| AT5G15300 | Pentatricopeptide repeat (PPR) superfamily protein      | mitochondr | 3                 |
| AT1G61870 | pentatricopeptide repeat 336                            | mitochondr | 1                 |

PFAM Domains & number

| PF13041 | PF13812 |
|---------|---------|
| 2       | 0       |
| 1       | 1       |
| 2       | 0       |
| 0       | 0       |
| 3       | 0       |
| 3       | 0       |
| 3       | 0       |
| 2       | 1       |
| 2       | 0       |
| 1       | 3       |
| 2       | 1       |
| 2       | 0       |
