# Supplementary material
Source: publisher figshare collection journal article supplement (https://tandf.figshare.com/articles/dataset/_/4793818)
Supplement: Supplementary file 2 [file 1]

| <b>AGI</b>       | <b>Description</b>                                                                              |
|------------------|-------------------------------------------------------------------------------------------------|
| AT5G47930        | Zinc-binding ribosomal protein family protein                                                   |
| AT4G12240        | zinc finger (C2H2 type) family protein                                                          |
| AT2G47260        | WRKY DNA-binding protein 23                                                                     |
| AT1G48170        | unknown protein; Has 78 Blast hits to 78 proteins in 34 species: Archae - 0; Bacteria - 0; Meta |
| AT2G44820        | unknown protein; Has 70 Blast hits to 70 proteins in 25 species: Archae - 0; Bacteria - 0; Meta |
| AT3G17890        | unknown protein; Has 31 Blast hits to 31 proteins in 12 species: Archae - 0; Bacteria - 4; Meta |
| <b>AT4G22000</b> | unknown protein; Has 30201 Blast hits to 17322 proteins in 780 species: Archae - 12; Bacteria   |
| AT5G22040        | unknown protein; Has 30201 Blast hits to 17322 proteins in 780 species: Archae - 12; Bacteria   |
| AT2G43110        | unknown protein; Has 212 Blast hits to 211 proteins in 96 species: Archae - 0; Bacteria - 6; Me |
| <b>AT4G30662</b> | unknown protein; FUNCTIONS IN: molecular_function unknown; INVOLVED IN: biological_pro          |
| AT5G11630        | unknown protein; FUNCTIONS IN: molecular_function unknown; INVOLVED IN: biological_pro          |
| AT3G02220        | unknown protein; CONTAINS InterPro DOMAIN/s: Protein of unknown function DUF2039 (Int           |
| AT2G23370        | unknown protein; BEST Arabidopsis thaliana protein match is: unknown protein (TAIR:AT4G3        |
| AT2G04670        | transposable element gene                                                                       |
| AT3G42810        | transposable element gene                                                                       |
| AT3G20000        | translocase of the outer mitochondrial membrane 40                                              |
| AT1G57660        | Translation protein SH3-like family protein                                                     |
| <b>AT3G49910</b> | Translation protein SH3-like family protein                                                     |
| AT2G40360        | Transducin/WD40 repeat-like superfamily protein                                                 |
| <b>AT5G14050</b> | Transducin/WD40 repeat-like superfamily protein                                                 |
| AT5G15550        | Transducin/WD40 repeat-like superfamily protein                                                 |
| <b>AT1G55890</b> | Tetratricopeptide repeat (TPR)-like superfamily protein                                         |
| <b>AT2G37230</b> | Tetratricopeptide repeat (TPR)-like superfamily protein                                         |
| AT3G02650        | Tetratricopeptide repeat (TPR)-like superfamily protein                                         |
| AT1G02370        | Tetratricopeptide repeat (TPR)-like superfamily protein                                         |
| AT4G34360        | S-adenosyl-L-methionine-dependent methyltransferases superfamily protein                        |
| AT5G14600        | S-adenosyl-L-methionine-dependent methyltransferases superfamily protein                        |
| AT1G80620        | S15/NS1, RNA-binding protein                                                                    |
| AT2G21440        | RNA-binding (RRM/RBD/RNP motifs) family protein                                                 |
| AT4G15850        | RNA helicase 1                                                                                  |
| AT1G63780        | Ribosomal RNA processing Brix domain protein                                                    |
| AT5G06360        | Ribosomal protein S8e family protein                                                            |
| AT5G10360        | Ribosomal protein S6e                                                                           |
| AT3G44010        | Ribosomal protein S14p/S29e family protein                                                      |
| AT3G62870        | Ribosomal protein L7Ae/L30e/S12e/Gadd45 family protein                                          |
| AT4G10450        | Ribosomal protein L6 family                                                                     |
| AT3G25520        | ribosomal protein L5                                                                            |
| AT2G20060        | Ribosomal protein L4/L1 family                                                                  |
| AT3G28900        | Ribosomal protein L34e superfamily protein                                                      |
| <b>AT2G42650</b> | Ribosomal protein L1p/L10e family                                                               |
| AT4G02230        | Ribosomal protein L19e family protein                                                           |
| AT1G04480        | Ribosomal protein L14p/L23e family protein                                                      |
| AT3G01790        | Ribosomal protein L13 family protein                                                            |
| AT1G43170        | ribosomal protein 1                                                                             |

|           |                                                                                       |
|-----------|---------------------------------------------------------------------------------------|
| AT5G09840 | Putative endonuclease or glycosyl hydrolase                                           |
| AT3G04820 | Pseudouridine synthase family protein                                                 |
| AT3G44850 | Protein kinase superfamily protein                                                    |
| AT3G27280 | prohibitin 4                                                                          |
| AT5G59980 | Polymerase/histidinol phosphatase-like                                                |
| AT1G49760 | poly(A) binding protein 8                                                             |
| AT2G28600 | P-loop containing nucleoside triphosphate hydrolases superfamily protein              |
| AT2G41670 | P-loop containing nucleoside triphosphate hydrolases superfamily protein              |
| AT3G09720 | P-loop containing nucleoside triphosphate hydrolases superfamily protein              |
| AT3G16840 | P-loop containing nucleoside triphosphate hydrolases superfamily protein              |
| AT4G10620 | P-loop containing nucleoside triphosphate hydrolases superfamily protein              |
| AT4G34910 | P-loop containing nucleoside triphosphate hydrolases superfamily protein              |
| AT2G30000 | PHF5-like protein                                                                     |
| AT2G14860 | Peroxisomal membrane 22 kDa (Mpv17/PMP22) family protein                              |
| AT1G61870 | pentatricopeptide repeat 336                                                          |
| AT2G21090 | Pentatricopeptide repeat (PPR-like) superfamily protein                               |
| AT1G16830 | Pentatricopeptide repeat (PPR) superfamily protein                                    |
| AT1G25360 | Pentatricopeptide repeat (PPR) superfamily protein                                    |
| AT1G71210 | Pentatricopeptide repeat (PPR) superfamily protein                                    |
| AT3G22670 | Pentatricopeptide repeat (PPR) superfamily protein                                    |
| AT3G61520 | Pentatricopeptide repeat (PPR) superfamily protein                                    |
| AT5G15300 | Pentatricopeptide repeat (PPR) superfamily protein                                    |
| AT1G50920 | Nucleolar GTP-binding protein                                                         |
| AT3G57000 | nucleolar essential protein-related                                                   |
| AT2G40780 | Nucleic acid-binding, OB-fold-like protein                                            |
| AT1G03530 | nuclear assembly factor 1                                                             |
| AT1G18800 | NAP1-related protein 2                                                                |
| AT5G13070 | MSF1-like family protein                                                              |
| AT4G11060 | mitochondrially targeted single-stranded DNA binding protein                          |
| AT4G31930 | Mitochondrial glycoprotein family protein                                             |
| AT3G26410 | methyltransferases;nucleic acid binding                                               |
| AT1G64600 | methyltransferases;copper ion binding                                                 |
| AT2G45240 | methionine aminopeptidase 1A                                                          |
| AT3G49420 | Got1/Sft2-like vesicle transport protein family                                       |
| AT5G57500 | Galactosyltransferase family protein                                                  |
| AT3G01160 | FUNCTIONS IN: molecular_function unknown; INVOLVED IN: biological_process unknown; LO |
| AT1G02870 | FUNCTIONS IN: molecular_function unknown; INVOLVED IN: biological_process unknown; EX |
| AT3G16700 | Fumarylacetoacetate (FAA) hydrolase family                                            |
| AT4G38890 | FMN-linked oxidoreductases superfamily protein                                        |
| AT2G31725 | Eukaryotic protein of unknown function (DUF842)                                       |
| AT1G63250 | DEA(D/H)-box RNA helicase family protein                                              |
| AT5G16060 | Cytochrome c oxidase biogenesis protein Cmc1-like                                     |
| AT3G62940 | Cysteine proteinases superfamily protein                                              |
| AT5G18920 | Cox19-like CHCH family protein                                                        |
| AT5G23395 | Cox19-like CHCH family protein                                                        |

|           |                                                                                           |
|-----------|-------------------------------------------------------------------------------------------|
| AT4G03180 | CONTAINS InterPro DOMAIN/s: rRNA processing (InterPro:IPR013730); Has 898 Blast hits to 6 |
| AT4G27010 | CONTAINS InterPro DOMAIN/s: Ribosome 60S biogenesis N-terminal (InterPro:IPR021714); B    |
| AT2G03670 | cell division cycle 48B                                                                   |
| AT2G44510 | CDK inhibitor P21 binding protein                                                         |
| AT1G18480 | Calcineurin-like metallo-phosphoesterase superfamily protein                              |
| AT5G39840 | ATP-dependent RNA helicase, mitochondrial, putative                                       |
| AT4G31810 | ATP-dependent caseinolytic (Clp) protease/crotonase family protein                        |
| AT2G19640 | ASH1-related protein 2                                                                    |
| AT3G07750 | 3'-5'-exoribonuclease family protein                                                      |
| AT3G60500 | 3'-5'-exoribonuclease family protein                                                      |

**Localization**

nucleus

plastid

plasma membrane

plasma membrane

nucleus

mitochondrion

nucleus

mitochondrion

mitochondrion

mitochondrion

mitochondrion

mitochondrion

mitochondrion

mitochondrion

mitochondrion

[illegible]

cytosol

cytosol

cytosol

cytosol

cytosol

cytosol

cytosol

cytosol

cytosol

cytosol
